# Supplementary material for: Overcoming barriers to green chemistry in the pharmaceutical industry – the Green Aspiration Level™ concept
Source: Royal Society of Chemistry journal article supplement (doi:10.1039/c4gc01563k), 2014-11-19
Supplement: c4gc01563k1.pdf [file c4gc01563k1.pdf]

## APPENDIX 1

# Overcoming Barriers to Green Chemistry in the Pharmaceutical Industry - The Green Aspiration Level™ Concept

Cite this: DOI: 10.1039/x0xx00000x

F. Roschangar,<sup>a</sup> R. A. Sheldon<sup>b</sup> and C. H. Senanayake<sup>a</sup>

Received 00th January 2014,

Accepted 00th January 2014

DOI: 10.1039/x0xx00000x

www.rsc.org/

## Appendix 1 – E factor preference explained

Here we rationalize why the E factor is more appropriate and mathematically consistent for multi-step process analysis using the generic two-step process example shown in Scheme 1 and detailed in Table 1.

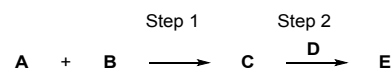

**Scheme 1. Generic Two-Step Process.**

We first determine the values for the Step and Process PMI and cEF using the formulas of Equation 1 and show the results in Table 2.

## Equation 1. Formula for PMI and CEF Determination.

$$PMI = \frac{\sum m(\text{Raw Materials}) + \sum m(\text{Reagents}) + \sum m(\text{Solvents}) + \sum m(\text{Water})}{m(\text{Product})}$$

$$cEF = \frac{\sum m(\text{Raw Materials}) + \sum m(\text{Reagents}) + \sum m(\text{Solvents}) + \sum m(\text{Water}) - m(\text{Product})}{m(\text{Product})}$$

The PMI and cEF *step contributions* to the process are calculated by multiplying the results for step PMI and step cEF with the amount of step 1 intermediate C required to make 1 kg of the process product, which is 1.1 kg. The total product amount is the amount of Step 2 product, and the total raw materials are the sum of the raw materials used in Step 1 and 2 minus the amount of Step 1 product since it has a net mass effect of zero kg on the overall process after considering it as Step 2 raw material.

**Table 1. Material Input-Output Table for the Generic Two-Step Process.**

| Step Number | Input Material | Input Type     | Output Material | MW [g/mol] | Equiv | Input Weight | Input Mol | Output Weight | Yield |
|-------------|----------------|----------------|-----------------|------------|-------|--------------|-----------|---------------|-------|
| 1           | A              | Raw Material   |                 | 100.00     | 1.0   | 0.558 kg     | 5.6       |               | 80%   |
|             | B              | Raw Material   |                 | 200.00     | 1.2   | 1.339 kg     | 6.7       |               |       |
|             |                | Reagent        |                 | 120.00     | 2.0   | 1.339 kg     | 11.2      |               |       |
|             |                | Solvent        |                 | 80.00      | 10.0  | 4.464 kg     | 55.8      |               |       |
|             |                | Water (Workup) |                 | 18.02      | 50.0  | 5.028 kg     | 279.0     |               |       |
|             |                | Intermediate   | C               | 240.00     |       |              |           | 1.071 kg      |       |
| 2           | C              | Intermediate   |                 | 240.00     | 1.0   | 1.071 kg     | 4.5       |               | 80%   |
|             | D              | Raw Material   |                 | 100.00     | 1.2   | 0.536 kg     | 5.4       |               |       |
|             |                | Reagent        |                 | 100.00     | 2.0   | 0.893 kg     | 8.9       |               |       |
|             |                | Solvent        |                 | 80.00      | 15.0  | 5.357 kg     | 67.0      |               |       |
|             |                | Water (Workup) |                 | 18.02      | 70.0  | 5.631 kg     | 312.5     |               |       |
|             |                | Product        | E               | 280.00     |       |              |           | 1.000 kg      |       |

Table 2. PMI and cEF Results for the Generic Two-Step Process.

| Step Number  | Raw Materials | Reagents      | Solvents (excl. Water) | Water          | Product       | PMI        |                         | cE-Factor      |                         |
|--------------|---------------|---------------|------------------------|----------------|---------------|------------|-------------------------|----------------|-------------------------|
|              |               |               |                        |                |               | Step PMI   | Contribution to Process | Step cE-Factor | Contribution to Process |
| 1            | 1.9 kg        | 1.3 kg        | 4.5 kg                 | 5.0 kg         | 1.1 kg        | 11.9 kg/kg | 12.7 kg/kg              | 10.9 kg/kg     | 11.7 kg/kg              |
| 2            | 1.6 kg        | 0.9 kg        | 5.4 kg                 | 5.6 kg         | 1.0 kg        | 13.5 kg/kg | 13.5 kg/kg              | 12.5 kg/kg     | 12.5 kg/kg              |
| <b>TOTAL</b> | <b>2.4 kg</b> | <b>2.2 kg</b> | <b>9.8 kg</b>          | <b>10.7 kg</b> | <b>1.0 kg</b> |            | <b>25.1 kg/kg</b>       |                | <b>24.1 kg/kg</b>       |

When determining process PMI and process cEF, we sum raw materials, reagents, solvents, and water, and deploy the formulas of Equation 1 that were previously used to determine the corresponding step values. It is important to note that the total amount of process raw materials is determined by adding the step raw materials including step 1 intermediate C (1.9 and 1.6 kg from Table 2), and subtracting the amount of step 1 intermediate C (1.1 kg), because intermediate C is not only the product of Step 1 but also fully consumed as raw material in Step 2, so its net process mass contribution is zero kg. We determine that process PMI is 25.1 kg/kg and process cEF is 24.1 kg/kg.

Now we can relate step to process PMI and cEF as follows for this two-step process, with PMI (step  $n$ ) = PMI contribution of step  $n$  to overall 2-step process, and  $m(i, \text{step}1)$  = mass of step 1 intermediate C needed to make 1 kg of the process product E (Equation 2).

#### Equation 2. Process PMI and cEF for the Sample 2-Step Process.

$$PMI(2 - \text{step process}) = \sum_1^2 PMI(\text{step } n) - m(i,1) = PMI(\text{Step } 1) + PMI(\text{Step } 2) - m(i, \text{step}1)$$

$$cEF(2 - \text{step process}) = \sum_1^2 cEF(\text{step } n) = cEF(\text{Step } 1) + cEF(\text{Step } 2)$$

For a three-step process, we subtract the mass of step 1 and step 2 intermediates required to make 1 kg of process product from the sum of the step PMIs, for a four-step process we subtract the mass of step 1-3 intermediates required to make 1 kg of process product, etc., which can be mathematically formulated as follows (Equation 3):

#### Equation 3. General Process PMI formula.

$$PMI(n - \text{step process}) = \sum_1^n PMI(\text{step } n) - \sum_1^{n-1} m(i, \text{step } n)$$

Unlike with the E factors, we cannot simply add up the step PMI contributions to obtain the process PMI, because the PMI does not discount the step product from the step mass balance. For a two step-process, therefore, in which the step 1 product that in our example is intermediate C, has no net mass contribution to the process, the mass of intermediate C required to make 1 kg API, which is 1.1 kg, needs to be subtracted out from the sum of the step PMIs to arrive at the process PMI:

$$PMI(\text{process}) = PMI(\text{Step } 1) + PMI(\text{Step } 2) - m(i, \text{step}1) = (12.7 + 13.5 - 1.1) \frac{\text{kg}}{\text{kg}} = 25.1 \frac{\text{kg}}{\text{kg}}$$

Therefore, the PMI is *inconsistent* in its application to a step versus a process since it largely discounts the step products and intermediates for *process* PMI analysis, but does not discount the step product for *step* PMI analysis. In other words, the PMI always equals cEF+1, independent of the number of process steps, and for infinite number of process steps it will be equal to the cEF. The E factor concept is more coherent in terms of relating step and process values, as the process E factor represents simply the sum of the step E factor contributions as expressed with the general formula for the cEF shown in Equation 4. The same formula would apply to the sEF.

#### Equation 4. General cEF Formula.

$$cEF(n - \text{step process}) = \sum_1^n cEF(\text{step } n)$$
