# Supplementary material for: Overcoming barriers to green chemistry in the pharmaceutical industry – the Green Aspiration Level™ concept
Source: Royal Society of Chemistry journal article supplement (doi:10.1039/c4gc01563k), 2014-11-19
Supplement: c4gc01563k2.pdf [file c4gc01563k2.pdf]

Table 2. sEF, cEF, and E factor Analysis of the Commercial Viagra™ Process.

| Step Number  | Raw Materials | Reagents      | Solvents (excl. Water) | Water          | Product       | Step sE-Factor | sE-Factor Contribution to Process | Step cE-Factor | cE-Factor Contribution to Process | E-Factor Contribution to Process |
|--------------|---------------|---------------|------------------------|----------------|---------------|----------------|-----------------------------------|----------------|-----------------------------------|----------------------------------|
| 1a+b         | 2.2 kg        | 0.3 kg        | 0.0 kg                 | 12.2 kg        | 0.7 kg        | 2.8 kg/kg      | 1.9 kg/kg                         | 21.1 kg/kg     | 14.1 kg/kg                        | 1.9 kg/kg                        |
| 2            | 1.1 kg        | 0.4 kg        | 1.8 kg                 | 1.7 kg         | 0.4 kg        | 2.8 kg/kg      | 1.1 kg/kg                         | 11.9 kg/kg     | 4.6 kg/kg                         | 1.3 kg/kg                        |
| 3a+b         | 1.1 kg        | 0.3 kg        | 10.7 kg                | 0.0 kg         | 0.8 kg        | 0.7 kg/kg      | 0.6 kg/kg                         | 13.9 kg/kg     | 11.3 kg/kg                        | 1.7 kg/kg                        |
| 4            | 0.8 kg        | 0.2 kg        | 3.1 kg                 | 8.1 kg         | 0.7 kg        | 0.5 kg/kg      | 0.3 kg/kg                         | 16.1 kg/kg     | 11.6 kg/kg                        | 0.7 kg/kg                        |
| 5            | 1.0 kg        | 0.0 kg        | 8.7 kg                 | 0.0 kg         | 1.0 kg        | 0.0 kg/kg      | 0.0 kg/kg                         | 8.7 kg/kg      | 8.7 kg/kg                         | 0.9 kg/kg                        |
| <b>TOTAL</b> | <b>3.6 kg</b> | <b>1.3 kg</b> | <b>24.3 kg</b>         | <b>22.1 kg</b> | <b>1.0 kg</b> |                | <b>3.9 kg/kg</b>                  |                | <b>50.3 kg/kg</b>                 | <b>6.4 kg/kg</b>                 |

The total process product amount equals the amount of Step 5 product, and the total raw materials are the sum of the raw materials used in Steps 1-5 minus the amount of Step 1-4

products since they have a net mass effect of zero kg on the overall process as they are used as raw materials for the subsequent step. Our result for Sheldon's traditional E factor is 6.4 kg/kg and corresponds well with Pfizer's reported 6 kg/kg

Table 3. Material Table for the 1-Methyl-4-nitro-3-propyl-1H-pyrazole-5-carboxylic Acid (1) Sub-Process.

| Step Number | Input Materials                                           | Name                                                      | Input Type              | Output | MW [g/mol] | Density [g/mL] | Equiv   | Concentration | Input Weight | Input Volume | Input Mol | Output Weight | Price per Unit (Sigma-Aldrich / February 2014) | Unit     | Price per Mol | Sigma-Aldrich Cat. No. | Yield |
|-------------|-----------------------------------------------------------|-----------------------------------------------------------|-------------------------|--------|------------|----------------|---------|---------------|--------------|--------------|-----------|---------------|------------------------------------------------|----------|---------------|------------------------|-------|
| S1          | A1                                                        | Diethyl oxalate                                           | Raw Material            |        | 146.14     | 1.076          | 1.000   |               | 1.894 kg     | 1.761 L      | 12.963    |               | \$ 113.50                                      | 3 kg     | \$ 5.53       | 135364                 | 70%   |
|             | A2                                                        | 2-Pentanone                                               | Raw Material            |        | 86.13      | 0.809          | 1.000   |               | 1.117 kg     | 1.380 L      | 12.963    |               | \$ 441.00                                      | 20 kg    | \$ 1.90       | W284203-20KG           |       |
|             |                                                           | Sodium                                                    | Reagent                 |        | 22.99      |                | 0.500   |               | 0.149 kg     |              | 6.482     |               | \$ 178.50                                      | 0.450 kg | \$ 9.12       | 282065-450G            |       |
|             |                                                           | Ethanol, denatured                                        | Solvent                 |        | 46.07      | 0.789          | 31.715  |               | 18.940 kg    | 24.006 L     | 411.123   |               | \$ 2,730.00                                    | 200 L    | \$ 0.80       | 187380-200L            |       |
|             |                                                           | Ethyl 2,4-dioxoheptanoate                                 | Intermediate (external) | A3     | 186.21     |                |         |               |              |              |           | 1.690 kg      |                                                |          |               |                        |       |
| S2          | A3                                                        | Ethyl 2,4-dioxoheptanoate                                 | Intermediate (external) |        | 186.21     |                | 1.000   |               | 1.690 kg     |              | 9.074     |               | n/a                                            |          |               |                        | 96%   |
|             |                                                           | Hydrazine hydrate                                         | Raw Material            |        | 50.05      | 1.029          | 1.098   |               | 0.499 kg     | 0.485 L      | 9.966     |               | \$ 123.50                                      | 1 kg     | \$ 6.18       | 225819-1KG             |       |
|             |                                                           | Acetic acid                                               | Solvent                 |        | 60.05      | 1.049          | 6.496   |               | 3.540 kg     | 3.374 L      | 58.943    |               | \$ 334.00                                      | 18 L     | \$ 1.06       | A6283-18L              |       |
|             |                                                           | Ethyl 3-n-propylpyrazole-5-carboxylate                    | Intermediate (external) | A4     | 182.22     |                |         |               |              |              |           | 1.587 kg      |                                                |          |               |                        |       |
| S3          | A4                                                        | Ethyl 3-n-propylpyrazole-5-carboxylate                    | Intermediate (external) |        | 182.22     |                | 1.000   |               | 1.587 kg     |              | 8.711     |               | n/a                                            |          |               |                        | 79%   |
|             |                                                           | Dimethyl sulfate                                          | Raw Material            |        | 126.13     | 1.333          | 1.008   |               | 1.107 kg     | 0.831 L      | 8.777     |               | \$ 853.00                                      | 18 L     | \$ 4.48       | D186309-18L-KL         |       |
|             |                                                           | Dichloromethane                                           | Solvent                 |        | 84.93      | 1.325          | 15.719  |               | 11.630 kg    | 8.777 L      | 136.933   |               | \$ 618.00                                      | 18 L     | \$ 2.20       | 270997-18L-P1          |       |
|             |                                                           | Sodium carbonate monohydrate                              | Reagent (Workup)        |        | 124.00     |                | 1.008   |               | 1.088 kg     |              | 8.777     |               | \$ 181.00                                      | 2.5 kg   | \$ 8.98       | 230952-2.5KG           |       |
|             |                                                           | Water                                                     | Water (Workup)          |        | 18.02      | 1.000          | 55.914  |               | 8.777 kg     | 8.777 L      | 487.079   |               | \$ -                                           |          |               |                        |       |
|             | 1-Methyl-3-n-propylpyrazole-5-carboxylic acid ethyl ester | Intermediate (external)                                   | A5                      | 196.25 |            |                |         |               |              |              | 1.351 kg  |               |                                                |          |               |                        |       |
| S4          | A5                                                        | 1-Methyl-3-n-propylpyrazole-5-carboxylic acid ethyl ester | Intermediate (external) |        | 196.25     |                | 1.000   |               | 1.351 kg     |              | 6.882     |               | n/a                                            |          |               |                        | 71%   |
|             |                                                           | Sodium hydroxide                                          | Reagent                 |        | 40.00      |                | 3.000   |               | 0.826 kg     |              | 20.645    |               | \$ 339.50                                      | 12 kg    | \$ 1.13       | 221465-12KG            |       |
|             |                                                           | Water                                                     | Water                   |        | 18.02      | 1.000          | 55.494  |               | 6.882 kg     | 6.882 L      | 381.899   |               | \$ -                                           |          |               |                        |       |
|             |                                                           | Concentrated hydrochloric acid                            | Reagent (Workup)        |        | 36.46      | 1.200          | 3.044   | 37%           | 2.065 kg     | 1.720 L      | 20.951    |               | \$ 327.50                                      | 15 L     | \$ 1.79       | 320331-6X2.5L          |       |
|             |                                                           | 1-Methyl-3-propylpyrazole-5-carboxylic acid               | Intermediate (external) | A6     | 168.20     |                |         |               |              |              |           | 0.822 kg      |                                                |          |               |                        |       |
| S5          | A6                                                        | 1-Methyl-3-propylpyrazole-5-carboxylic acid               | Intermediate (external) |        | 168.20     |                | 1.000   |               | 0.822 kg     |              | 4.886     |               | n/a                                            |          |               |                        | 96%   |
|             |                                                           | Sulfuric acid, 95-98%                                     | Reagent                 |        | 98.08      | 1.840          | 12.626  |               | 6.051 kg     | 3.288 L      | 61.691    |               | \$ 418.50                                      | 15 L     | \$ 1.49       | 320501-6X2.5L          |       |
|             |                                                           | Nitric acid, fuming, 90%                                  | Raw Material            |        | 63.01      | 1.480          | 1.367   |               | 0.421 kg     | 0.284 L      | 6.680     |               | \$ 594.00                                      | 0.5 L    | \$ 50.58      | 309079-500ML           |       |
|             |                                                           | Sulfuric acid, 95-98%                                     | Reagent                 |        | 98.08      | 1.840          | 2.680   |               | 1.284 kg     | 0.698 L      | 13.095    |               | \$ 418.50                                      | 15 L     | \$ 1.49       | 320501-6X2.5L          |       |
|             |                                                           | Water                                                     | Water (Workup)          |        | 18.02      | 1.000          | 199.661 |               | 17.580 kg    | 17.580 L     | 975.561   |               | \$ -                                           |          |               |                        |       |
|             | 1-Methyl-4-nitro-3-propyl-1H-pyrazole-5-carboxylic acid   | Intermediate (external)                                   | 1                       | 213.19 |            |                |         |               |              |              | 1.000 kg  |               |                                                |          |               |                        |       |

Table 4. sEF, cEF, and E factor Analysis for the 1-Methyl-4-nitro-3-propyl-1H-pyrazole-5-carboxylic Acid (1) Sub-Process.

| Step Number  | Raw Materials | Reagents       | Solvents (excl. Water) | Water          | Product       | sE-Factor      |                             | cE-Factor      |                             | E-Factor Contribution to Sub-Process |
|--------------|---------------|----------------|------------------------|----------------|---------------|----------------|-----------------------------|----------------|-----------------------------|--------------------------------------|
|              |               |                |                        |                |               | Step sE-Factor | Contribution to Sub-Process | Step cE-Factor | Contribution to Sub-Process |                                      |
| S1           | 3.0 kg        | 0.1 kg         | 18.9 kg                | 0.0 kg         | 1.7 kg        | 0.9 kg/kg      | 1.5 kg/kg                   | 12.1 kg/kg     | 20.4 kg/kg                  | 3.4 kg/kg                            |
| S2           | 2.2 kg        | 0.0 kg         | 3.5 kg                 | 0.0 kg         | 1.6 kg        | 0.4 kg/kg      | 0.6 kg/kg                   | 2.6 kg/kg      | 4.1 kg/kg                   | 1.0 kg/kg                            |
| S3           | 2.7 kg        | 1.1 kg         | 11.6 kg                | 8.8 kg         | 1.4 kg        | 1.8 kg/kg      | 2.4 kg/kg                   | 16.9 kg/kg     | 22.8 kg/kg                  | 3.6 kg/kg                            |
| S4           | 1.4 kg        | 1.6 kg         | 0.0 kg                 | 8.2 kg         | 0.8 kg        | 2.6 kg/kg      | 2.1 kg/kg                   | 12.5 kg/kg     | 10.3 kg/kg                  | 2.1 kg/kg                            |
| S5           | 1.2 kg        | 7.3 kg         | 0.0 kg                 | 17.6 kg        | 1.0 kg        | 7.6 kg/kg      | 7.6 kg/kg                   | 25.2 kg/kg     | 25.2 kg/kg                  | 7.6 kg/kg                            |
| <b>TOTAL</b> | <b>5.0 kg</b> | <b>10.2 kg</b> | <b>34.1 kg</b>         | <b>34.5 kg</b> | <b>1.0 kg</b> |                | <b>14.2 kg/kg</b>           |                | <b>82.8 kg/kg</b>           | <b>17.6 kg/kg</b>                    |

of actual waste. The process sEF, which excludes solvents and process water, is calculated as 3.9 kg/kg, and the all-inclusive cEF is 50.3 kg/kg.

Table 5. Conversion of Intrinsic E factors to E factor Process Contributions for Compound 1.

| INTRINSIC                                                   |            |            |
|-------------------------------------------------------------|------------|------------|
| sEF                                                         | cEF        | E-Factor   |
| Contribution to Compound 1 Sub-Process                      |            |            |
| 14.2 kg/kg                                                  | 82.8 kg/kg | 17.6 kg/kg |
| <i>x Quantity needed to make 1 kg of sildenafil citrate</i> |            |            |
| <i>x</i>                                                    | 0.424      |            |
| =                                                           |            |            |
| sEF                                                         | cEF        | E-Factor   |
| Contribution to Sildenafil Citrate Process                  |            |            |
| 6.0 kg/kg                                                   | 35.1 kg/kg | 7.5 kg/kg  |

Next we assess the synthesis starting point matter. While raw materials chlorosulfonic acid (\$10.23/mol), 1-methylpiperazine (6; \$24.64/mol), ammonium hydroxide solution (\$2.27/mol), citric acid (\$9.72/mol), and 2-ethoxybenzoic acid (4, \$96.55/mol) meet our 'raw material standard', one primary synthesis starting point 1-methyl-4-nitro-3-propyl-1H-pyrazole-

5-carboxylic acid (1, not available from Sigma-Aldrich's website) does not meet the requirement. Some may disagree with the proposed raw material rules, but these help emphasize, in a very simple way, that this raw material is significantly more complex than the other process raw materials and its intrinsic E factor ought to be included in order to arrive at a fair overall process waste figure. So we begin the process of determining the intrinsic E factor of the critical raw material.

Pyrazole starting point 1 is derived in five steps from readily available raw materials diethyl oxalate (A1; \$5.53/mol) and 2-pentanone (A2; \$1.90/mol) (Scheme 2)<sup>3</sup> In analogy to the sildenafil citrate process discussed above, we first derive the material table for the process to produce 1 kg of compound 1 (Table 3), and then perform the E factor analysis (Table 4).

As a result, the *intrinsic* sEF, E factor, and cEF for 1-methyl-4-nitro-3-propyl-1H-pyrazole-5-carboxylic acid (1) are determined as 14.2, 17.6, and 82.8 kg/kg, respectively, which when multiplied with the quantity of 1 needed to produce 1 kg of sildenafil citrate (0.424 kg), provide the sEF, E factor, and

Table 6. sEF, cEF, and E factor Analysis of the commercial Viagra™ Process starting from Commodity Raw Materials.

| TOTAL        |                | 2.1 kg        | 1.1 kg        | 0.0 kg                 | 3.0 kg         | 0.4 kg        | 2.8 kg/kg      |                         | 5.8 kg/kg      | 2.8 kg/kg               |                                  |
|--------------|----------------|---------------|---------------|------------------------|----------------|---------------|----------------|-------------------------|----------------|-------------------------|----------------------------------|
| Step Number  | Input Material | Raw Materials | Reagents      | Solvents (excl. Water) | Water          | Product       | sE-Factor      |                         | cE-Factor      |                         | E-Factor Contribution to Process |
|              |                |               |               |                        |                |               | Step sE-Factor | Contribution to Process | Step cE-Factor | Contribution to Process |                                  |
| 1a+b         |                | 2.2 kg        | 0.3 kg        | 0.0 kg                 | 12.2 kg        | 0.7 kg        | 2.8 kg/kg      | 1.9 kg/kg               | 21.1 kg/kg     | 14.1 kg/kg              | 1.9 kg/kg                        |
| 2            | 1              | 1.1 kg        | 0.4 kg        | 1.8 kg                 | 1.7 kg         | 0.4 kg        | 6.0 kg/kg      |                         | 35.1 kg/kg     |                         | 7.5 kg/kg                        |
|              |                | 1.1 kg        | 0.4 kg        | 1.8 kg                 | 1.7 kg         | 0.4 kg        | 2.8 kg/kg      | 1.1 kg/kg               | 11.9 kg/kg     | 4.6 kg/kg               | 1.3 kg/kg                        |
| 3a+b         |                | 1.1 kg        | 0.3 kg        | 10.7 kg                | 0.0 kg         | 0.8 kg        | 0.7 kg/kg      | 0.6 kg/kg               | 13.9 kg/kg     | 11.3 kg/kg              | 1.7 kg/kg                        |
| 4            |                | 0.8 kg        | 0.2 kg        | 3.1 kg                 | 8.1 kg         | 0.7 kg        | 0.5 kg/kg      | 0.3 kg/kg               | 16.1 kg/kg     | 11.6 kg/kg              | 0.7 kg/kg                        |
| 5            |                | 1.0 kg        | 0.0 kg        | 8.7 kg                 | 0.0 kg         | 1.0 kg        | 0.0 kg/kg      | 0.0 kg/kg               | 8.7 kg/kg      | 8.7 kg/kg               | 0.9 kg/kg                        |
| <b>TOTAL</b> |                | <b>5.3 kg</b> | <b>5.6 kg</b> | <b>38.8 kg</b>         | <b>36.7 kg</b> | <b>1.0 kg</b> |                | <b>9.9 kg/kg</b>        |                | <b>85.5 kg/kg</b>       | <b>13.8 kg/kg</b>                |

cEF contributions of **1** to the sildenafil citrate process of 6.0, 7.5, and 35.1 kg/kg, respectively (Table 5).

By not considering the intrinsic E factor, the sildenafil citrate analysis inherently assumed an E factor contribution of 0.424 kg/kg for compound **1** in the commercial process, which equals the compound's mass needed to produce 1 kg of sildenafil citrate. Thus, we effectively discounted between 5.6 kg (= 6.0 – 0.4) in terms of sEF, 7.1 kg for E factor, and 34.7 kg for cEF of intrinsic waste associate with the production of 1 kg compound **1**. If this material, as we assume, is not a commodity and is specifically made for the Viagra™ process, the intrinsic waste must therefore be considered in an objective process greenness analysis.

When including the intrinsic E factor of the non-commodity-type raw material **1**, the overall sildenafil citrate process analysis changes as shown in Table 6. We observe significant increases of the E factors, with the sEF jumping from 3.9 kg/kg using Pfizer's synthesis starting point to 9.9 kg/kg using our proposed commodity-type starting principles, the E factor going from 6.4 to 13.8 kg/kg, and the cEF changing from 50.3 to 85.5 kg/kg.

Therefore, depending on the type of E factor utilized, the exclusion of the two non-commodity-type raw materials in the analysis of the commercial Viagra™ process does not account for 40-60% of the process waste. This example shows how widely E factors can vary depending on the selected synthesis starting points, and thereby stresses the importance of implementing an industry-wide standardized starting point concept. Otherwise individual researchers will continue to

Before we can evaluate the process against the industrial Green Aspiration Level (GAL) for the commercial Viagra™ process, we need to determine its process complexity. By applying process ideality Equation 3 (see paper) and process complexity Equation 4 (see paper) to the entire Viagra™ process, including steps S1 through S5 according to our starting point definition, as shown in **Error! Reference source not found.**, we obtain a process complexity of 11 along with an ideality metric of 92% (Table 7).

**Table 7. Ideality Analyses for Viagra™ Process and Sub-process.**

| Target   | Transformations | Strategic Redox Reactions | Construction Reactions | Concession Steps | %Ideality | Complexity |
|----------|-----------------|---------------------------|------------------------|------------------|-----------|------------|
| Viagra   | 12              | 1                         | 10                     | 1                | 92%       | 11         |
| <b>1</b> | 5               | 0                         | 4                      | 1                | 80%       | 4          |

We also apply ideality analysis to the sub-processes for intermediate **1**. The functional intergroup conversion from the ethyl ester to the corresponding carboxylic acid in step S4 for intermediate **1** leads to reduced %ideality and reflects the only concession step in the entire Viagra™ process.

Given a process Complexity of 11, we can determine Viagra's process GALs (Table 8). We also determine the GALs for the sub-process leading to external intermediate **1**.

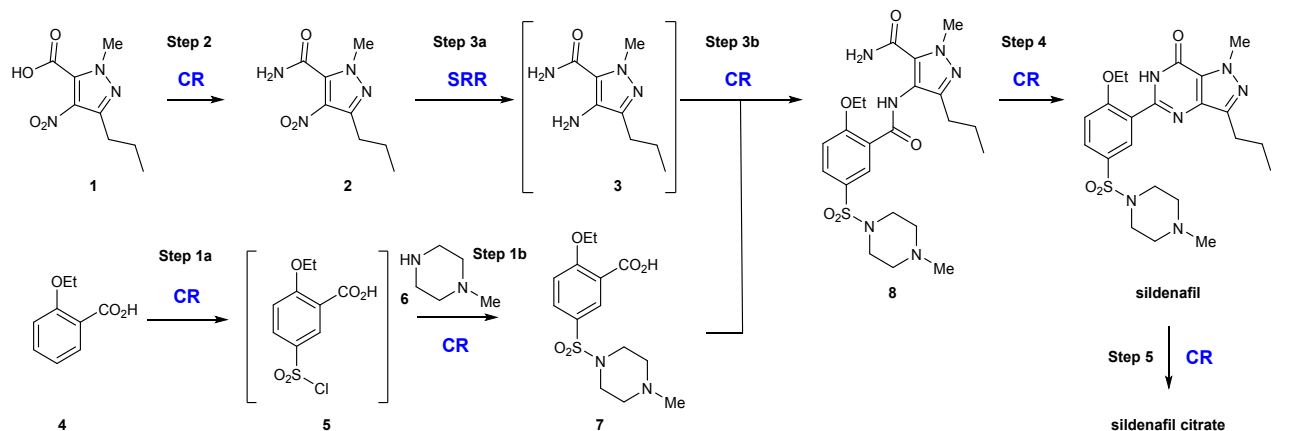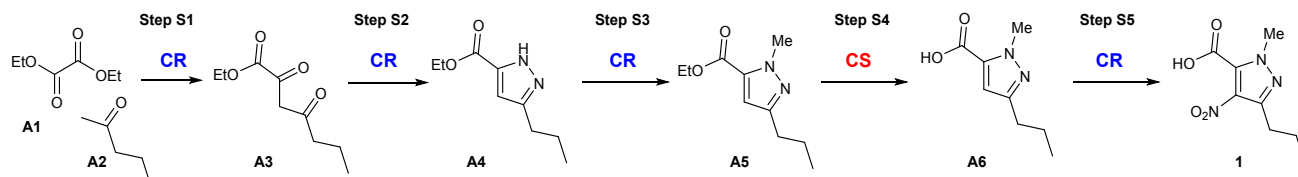

**Scheme 3. 'Complete' Commercial Viagra™ Process (CR = Construction Reaction, SRR = Strategic Redox Reaction, CS = Concession Step).**

select different starting points and render green process analysis and benchmarking less meaningful.

**Table 8. Green Aspiration Level (GAL) for the Commercial Viagra™ Process.**

| Commercial Process | Complexity | sEF-based Analysis |             | cEF-based Analysis |             |
|--------------------|------------|--------------------|-------------|--------------------|-------------|
|                    |            | tGAL [kg/kg]       | GAL [kg/kg] | tGAL [kg/kg]       | GAL [kg/kg] |
| Viagra™            | 11         | 3                  | 33          | 19                 | 209         |
| <b>1</b>           | 4          |                    | 12          |                    | 76          |

With the GALs available, we are ready to determine Relative Process Greenness (RPG, Table 9). Since we did not analyze Viagra's™ earlier development process for the purposes of this discussion, we also did not determine the Relative Process Improvement (RPI).

**Table 9. RPG Analysis for Commercial Viagra™ Process.**

| Commercial Process | sEF-based Analysis |             |                                  | cEF-based Analysis |             |                                  |
|--------------------|--------------------|-------------|----------------------------------|--------------------|-------------|----------------------------------|
|                    | Actual [kg/kg]     | GAL [kg/kg] | Relative Process Greenness (RPG) | Actual [kg/kg]     | GAL [kg/kg] | Relative Process Greenness (RPG) |
| Viagra™            | 10                 | 33          | 330%                             | 86                 | 209         | 243%                             |
| <b>1</b>           | 14                 | 12          | 86%                              | 83                 | 76          | 92%                              |

We derive that the 'complete' commercial Viagra™ process is 'very green', i.e. it exceeds its aspiration level, which represents the current industry average as reported by the ACS GCI Pharmaceutical Roundtable, 2.8 fold in terms of sEF and 2.5-fold in terms of cEF, and is therefore significantly more mass-efficient. The RPG in terms of solvents and process water could be improved for intermediate **1** [RPG(sEF) << 100]. However, we note that while we drew the synthesis information of the intermediates from the literature, it is highly likely that their processes were subsequently improved by third party manufacturers under trade secret agreements.

- 
- 1 The pricing is based on Sigma-Aldrich's online catalog information as of March 2014.
  - 2 See paper, reference 37.
  - 3 See paper, reference 77.
